# Supplementary material
Source: PubMed Central journal article supplement (PMC6943909)
Supplement: NIHMS1055344-supplement-1.pdf [file NIHMS1055344-supplement-1.pdf]

Supplemental Table: Antibiotic classes prescribed for dental conditions in the ED, by visit characteristics, 2011-2015

| Characteristic          | Raw number of visits with characteristic and antibiotics prescribed | Proportion (95% CI) of dental visits in which antibiotics were prescribed | P(chi2) |
|-------------------------|---------------------------------------------------------------------|---------------------------------------------------------------------------|---------|
| <b>Age</b>              |                                                                     |                                                                           | <0.0001 |
| Child (<18 years)       | 71                                                                  | 23% (16-31%)                                                              |         |
| Adult (>18 years)       | 1,324                                                               | 69% (66-72%)                                                              |         |
| <b>Insurance Status</b> |                                                                     |                                                                           | 0.03    |
| Private                 | 261                                                                 | 62% (50-73%)                                                              |         |
| Medicare                | 91                                                                  | 58% (47-68%)                                                              |         |
| Medicaid/CHIP           | 454                                                                 | 60% (54-65%)                                                              |         |
| Self-pay                | 423                                                                 | 74% (69-79%)                                                              |         |
| <b>Region</b>           |                                                                     |                                                                           | 0.32    |
| Northeast               | 216                                                                 | 59% (49-68%)                                                              |         |
| Midwest                 | 409                                                                 | 67% (57-76%)                                                              |         |
| South                   | 555                                                                 | 67% (63-72%)                                                              |         |
| West                    | 215                                                                 | 61% (54-76%)                                                              |         |
